# Supplementary material for: Hydroxycitric Acid Alleviated Lung Ischemia-Reperfusion Injury by Inhibiting Oxidative Stress and Ferroptosis through the Hif-1α Pathway
Source: MDPI journal article supplement (doi:10.3390/cimb45120616), 2023-12-08
Supplement: s1 [file s1]

# Supplementary Materials

**Table S1 The primers used in real-time PCR**

| Species      | Gene                            | Forward primer                 | Reverse primer                  |
|--------------|---------------------------------|--------------------------------|---------------------------------|
| <i>Mice</i>  | <i>TNF-<math>\alpha</math></i>  | <i>ACTGAACTTCGGGGTGATCGGT</i>  | <i>TGGTTTGCTACGACGTGGGCTA</i>   |
| <i>Mice</i>  | <i>IL-6</i>                     | <i>CCCCAATTTCCAATGCTCTCC</i>   | <i>CGCACTAGGTTTGCCGAGTA</i>     |
| <i>Mice</i>  | <i>IL-1<math>\beta</math></i>   | <i>AATGAAGGAACGGAGGAGCC</i>    | <i>CTCCAGCCAAGCTTCCTTGT</i>     |
| <i>Mice</i>  | <i><math>\beta</math>-actin</i> | <i>ACTCCACTCACGGCAAATTC</i>    | <i>TCTCCTATGGTGGTGACGACA</i>    |
| <i>Human</i> | <i>TNF-<math>\alpha</math></i>  | <i>TCCAGGCGGTGCTTGTTT</i>      | <i>GCTTGTCACCTCGGGGTTC</i>      |
| <i>Human</i> | <i>IL-6</i>                     | <i>AGCCCTGAGAAAGGAGACA</i>     | <i>CCAAAAGACCAGTGATGAT</i>      |
| <i>Human</i> | <i>IL-1<math>\beta</math></i>   | <i>CGGGACTCACAGCAAAAAA</i>     | <i>TTCAACACGCAGGACAGGT</i>      |
| <i>Human</i> | <i>HIF-1<math>\alpha</math></i> | <i>GAACGTCGAAAAGAAAAGTCTCG</i> | <i>CCTTATCAAGATGCGAACTCACA</i>  |
| <i>Human</i> | <i>HO-1</i>                     | <i>GCCAGCAACAAAGTGCAAGA</i>    | <i>TAAGGACCCATCGGAGAAGC</i>     |
| <i>Human</i> | <i>SLC7A11</i>                  | <i>TGTGGGGTCCTGTCACTATTTG</i>  | <i>GATATCACAGCAGTAGCTGCAGG</i>  |
| <i>Human</i> | <i>GPX4</i>                     | <i>GGCAAGACCGAAGTAAACTACAC</i> | <i>ACATATCGAATTTGACGTTGTAGC</i> |
| <i>Human</i> | <i>ZO-1</i>                     | <i>CAACATACAGTGACGCTTCACA</i>  | <i>CACTATTGACGTTTCCCCACTC</i>   |
| <i>Human</i> | <i>VE-Cadherin</i>              | <i>TTGGAACCAGATGCACATTGAT</i>  | <i>TCTTGCGACTCACGCTTGAC</i>     |
| <i>Human</i> | <i><math>\beta</math>-actin</i> | <i>ACAGAGCCTCGCCTTTGC</i>      | <i>CCACCATCACGCCCTGG</i>        |

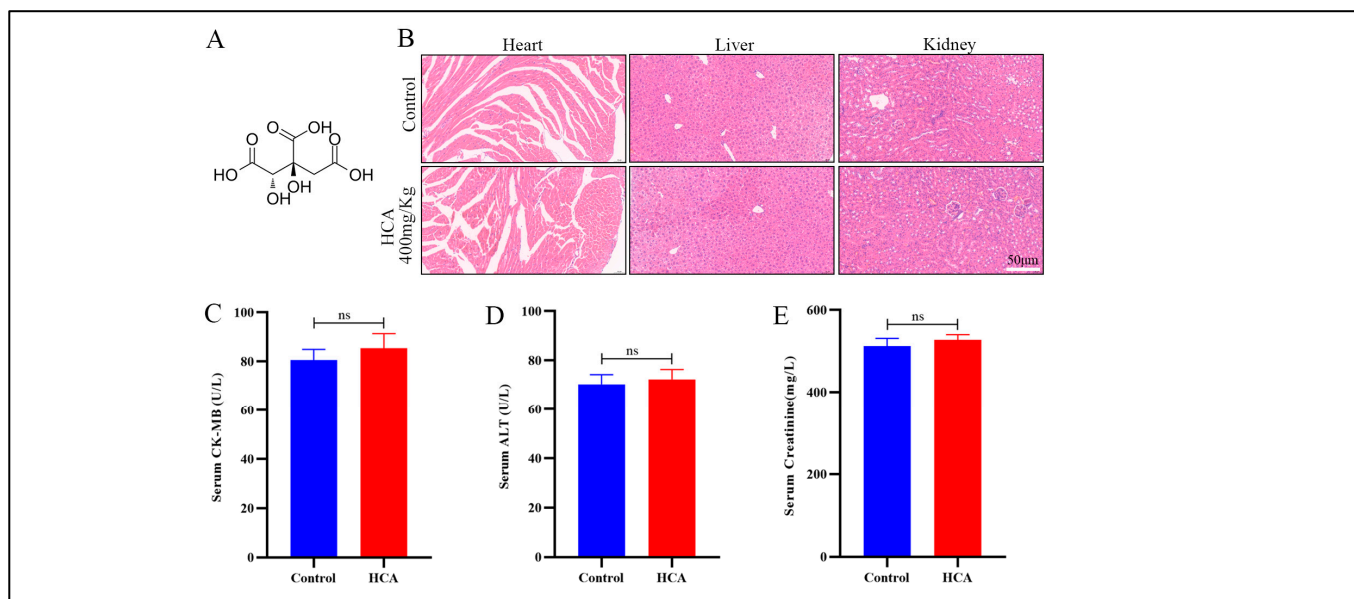

**Figure S1.** Therapeutic dose of HCA displayed no organic toxicity. (A) Molecular structure formula of (-)-Hydroxycitric acid. (B) Representative images of H&E staining of heart, liver and kidney tissue. Morphology was observed using light microscopy. (bar: 100 μm) (C) The levels of CK-MB, ALT and creatinine in serum. “\*” indicates significant differences between the different groups. \*P < 0.05, \*\*P < 0.01, \*\*\*P < 0.001, ns, no significance.

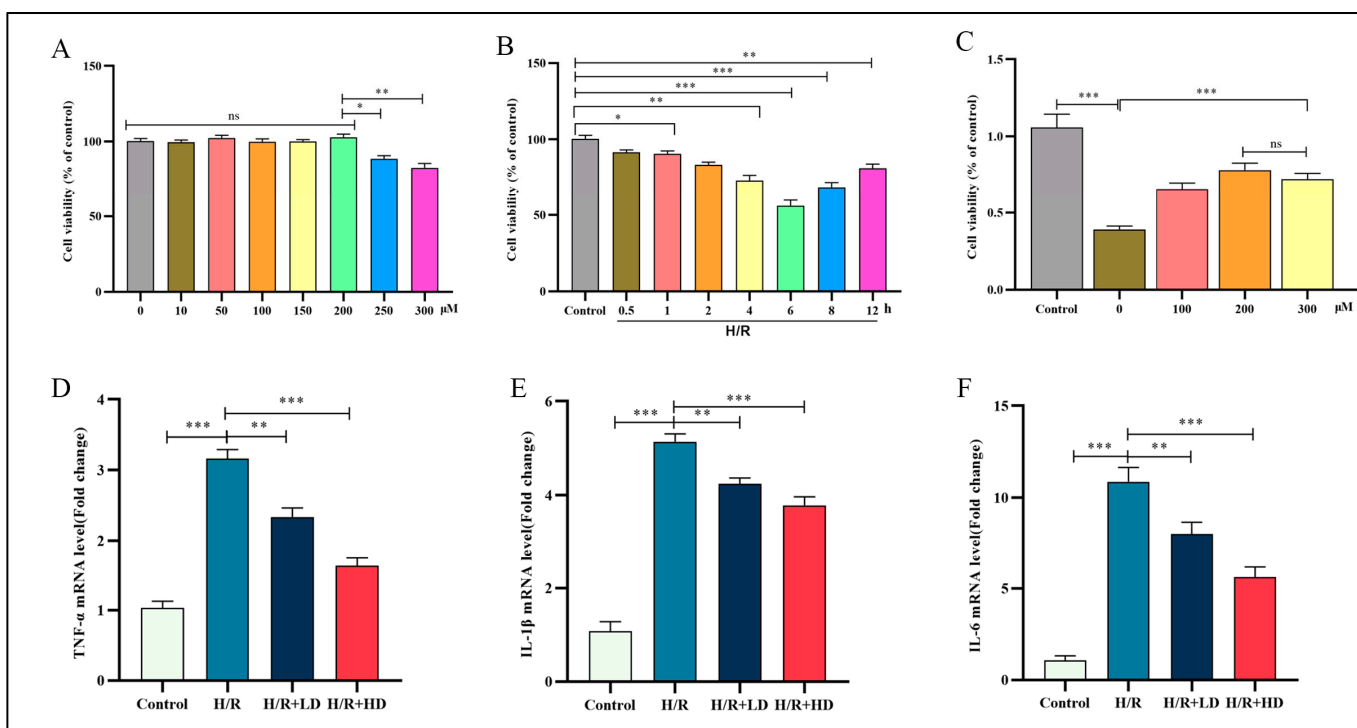

**Figure S2.** HCA attenuates H/R-induced HUVEC inflammation (A) Cell viability was measured with a CCK-8 assay after treatment of HCA at various concentrations (0, 10, 50, 100, 150, 200, 250 and 300 μM). (B) Cell viability was measured by CCK-8 assay at different reoxygenation times (0, 0.5, 1, 2, 4, 6, 8 and 12 h). (C) The cells were treated with different concentrations of HCA (100, 200, 300 μM), then the hypoxia (12h) and reoxygenation (6h) models were constructed. The cell viability was measured by CCK-8 assay. (D–F) The mRNA level of TNF-α, IL-1β and IL-6 in the indicated groups. \*P < 0.05, \*\*P < 0.01, \*\*\*P < 0.001, ns, no significance.
